# Supplementary material for: Identification and validation of potential key long noncoding RNAs in sorafenib-resistant hepatocellular carcinoma cells
Source: PeerJ. 2020 Feb 26;8:e8624. doi: 10.7717/peerj.8624 (PMC7049252; doi:10.7717/peerj.8624)
Supplement: Supplemental Information 1 — Real-time PCR was performed using SYBR Premix Ex Taq (TaKaRa) on a LightCycler480 instrument (Roche Diagnostics) according to the manufacturer’s protocol. GAPDH was used as an internal normalized reference, and fold changes were calculated by relative quantification (2−ΔΔCt). The expression of seven lncRNAs, TCONS_00215594, TCONS_00052270, TCONS_00284048, TCONS_00398166, TCONS_00389094 (Sheet1), TCONS_00006019 (Sheet2) and TCONS_00046965 (Sheet3) were run in both Huh7-S and HepG2-S cell lines compared to parental control cell lines. TCONS_00284048 and TCONS_00006019 were selected for use in further validation experiments. [file peerj-08-8624-s001.xlsx]

## Sheet: Sheet1
Sample	Task	Ct value
Huh7	GAPDH	13.83
Huh7	GAPDH	13.76
Huh7	GAPDH	13.76
Huh7-S	GAPDH	14.42
Huh7-S	GAPDH	14.38
Huh7-S	GAPDH	14.38
HepG2	GAPDH	14.27
HepG2	GAPDH	14.13
HepG2	GAPDH	14.2
HepG2-S	GAPDH	14.34
HepG2-S	GAPDH	14.29
HepG2-S	GAPDH	14.52
Huh7	TCONS_00215594	25.43
Huh7	TCONS_00215594	25.37
Huh7	TCONS_00215594	25.29
Huh7-S	TCONS_00215594	23.76
Huh7-S	TCONS_00215594	23.69
Huh7-S	TCONS_00215594	23.74
HepG2	TCONS_00215594	25.15
HepG2	TCONS_00215594	25.18
HepG2	TCONS_00215594	25.17
HepG2-S	TCONS_00215594	25.41
HepG2-S	TCONS_00215594	25.3
HepG2-S	TCONS_00215594	25.43
Huh7	TCONS_00052270	28.77
Huh7	TCONS_00052270	28.83
Huh7	TCONS_00052270	28.83
Huh7-S	TCONS_00052270	31.47
Huh7-S	TCONS_00052270	31.47
Huh7-S	TCONS_00052270	31.83
HepG2	TCONS_00052270	25.88
HepG2	TCONS_00052270	25.65
HepG2	TCONS_00052270	25.61
HepG2-S	TCONS_00052270	27.5
HepG2-S	TCONS_00052270	27.55
HepG2-S	TCONS_00052270	27.29
Huh7	TCONS_00284048	34.85
Huh7	TCONS_00284048	34.17
Huh7	TCONS_00284048	34.99
Huh7-S	TCONS_00284048	26.15
Huh7-S	TCONS_00284048	26.29
Huh7-S	TCONS_00284048	26.06
HepG2	TCONS_00284048	27.45
HepG2	TCONS_00284048	27.51
HepG2	TCONS_00284048	27.45
HepG2-S	TCONS_00284048	23.86
HepG2-S	TCONS_00284048	24.09
HepG2-S	TCONS_00284048	24.01
Huh7	TCONS_00398166	28.55
Huh7	TCONS_00398166	28.36
Huh7	TCONS_00398166	28.58
Huh7-S	TCONS_00398166	26.45
Huh7-S	TCONS_00398166	26.52
Huh7-S	TCONS_00398166	26.26
HepG2	TCONS_00398166	23.83
HepG2	TCONS_00398166	23.59
HepG2	TCONS_00398166	23.75
HepG2-S	TCONS_00398166	23.56
HepG2-S	TCONS_00398166	23.52
HepG2-S	TCONS_00398166	23.61
Huh7	TCONS_00389094	35.79
Huh7	TCONS_00389094	35.89
Huh7	TCONS_00389094	35.88
Huh7-S	TCONS_00389094	25.88
Huh7-S	TCONS_00389094	25.82
Huh7-S	TCONS_00389094	25.81
HepG2	TCONS_00389094	36.55
HepG2	TCONS_00389094	36.61
HepG2	TCONS_00389094	36.68
HepG2-S	TCONS_00389094	33.48
HepG2-S	TCONS_00389094	33.42
HepG2-S	TCONS_00389094	33.37

## Sheet: Sheet2
	Task	Ct value
Huh7	GAPDH	14.1
Huh7	GAPDH	14.08
Huh7	GAPDH	14.01
Huh7-S	GAPDH	14.59
Huh7-S	GAPDH	14.62
Huh7-S	GAPDH	14.62
HepG2	GAPDH	14.97
HepG2	GAPDH	15.09
HepG2	GAPDH	15.16
HepG2-S	GAPDH	14.44
HepG2-S	GAPDH	14.65
HepG2-S	GAPDH	14.56
Huh7	TCONS_00006019	35.93
Huh7	TCONS_00006019	35.82
Huh7	TCONS_00006019	35.78
Huh7-S	TCONS_00006019	26.1
Huh7-S	TCONS_00006019	26.01
Huh7-S	TCONS_00006019	26.01
HepG2	TCONS_00006019	26.64
HepG2	TCONS_00006019	26.76
HepG2	TCONS_00006019	26.8
HepG2-S	TCONS_00006019	23.38
HepG2-S	TCONS_00006019	23.25
HepG2-S	TCONS_00006019	23.29

## Sheet: Sheet3
	Task	Ct value
Huh7	GAPDH	13.97
Huh7	GAPDH	13.89
Huh7	GAPDH	14.01
Huh7-S	GAPDH	14.59
Huh7-S	GAPDH	14.51
Huh7-S	GAPDH	14.58
HepG2	GAPDH	15.02
HepG2	GAPDH	14.98
HepG2	GAPDH	15.03
HepG2-S	GAPDH	14.53
HepG2-S	GAPDH	14.39
HepG2-S	GAPDH	14.43
Huh7	TCONS_00046965	36.79
Huh7	TCONS_00046965	36.95
Huh7	TCONS_00046965	37.02
Huh7-S	TCONS_00046965	29.13
Huh7-S	TCONS_00046965	28.84
Huh7-S	TCONS_00046965	28.69
HepG2	TCONS_00046965	31.56
HepG2	TCONS_00046965	31.58
HepG2	TCONS_00046965	31.41
HepG2-S	TCONS_00046965	33.57
HepG2-S	TCONS_00046965	34.28
HepG2-S	TCONS_00046965	34.29
