# Supplementary material for: Identification and validation of potential key long noncoding RNAs in sorafenib-resistant hepatocellular carcinoma cells
Source: PeerJ. 2020 Feb 26;8:e8624. doi: 10.7717/peerj.8624 (PMC7049252; doi:10.7717/peerj.8624)
Supplement: Supplemental Information 2 — For the TCONS_00284048 knockdown experiments, siRNA was designed and synthesized by Gene Pharma Company (Shanghai, China) and the sequences were as follows: TCONS_00284048siRNA1:GGTCTTGCTGCTTCCTTTA; TCONS_00284048siRNA2: GATATGAATCGTTCCACAA; TCONS_00284048siRNA3:ACACCGGTCATATTATTGA. Transfections were carried out using lipofectamine 2000 reagent (Invitrogen) according to manufacturer’s protocol.The expression of TCONS_00284048 in sorafenib-resistant HepG2 cell lines (HepG2-S) were examined after transfected with siRNA knockdown system compared with the negative control (siRNA NC). Real-time PCR was performed using SYBR Premix Ex Taq (TaKaRa) on a LightCycler480 instrument (Roche Diagnostics) according to the manufacturer’s protocol. GAPDH was used as an internal normalized reference, and fold changes were calculated by relative quantification (2−ΔΔCt). TCONS_00284048siRNA1 was selected for use in further validation experiments. [file peerj-08-8624-s002.xlsx]

## Sheet: raw data
Sample		Task	Ct value
HepG2/SR+siRNA NC		GAPDH	14.65
HepG2/SR+siRNA NC		GAPDH	14.66
HepG2/SR+siRNA NC		GAPDH	14.63
HepG2/SR+TCONS_00284048siRNA1		GAPDH	14.71
HepG2/SR+TCONS_00284048siRNA1		GAPDH	14.56
HepG2/SR+TCONS_00284048siRNA1		GAPDH	14.43
HepG2/SR+TCONS_00284048siRNA2		GAPDH	14.59
HepG2/SR+TCONS_00284048siRNA2		GAPDH	14.91
HepG2/SR+TCONS_00284048siRNA2		GAPDH	14.71
HepG2/SR+TCONS_00284048siRNA3		GAPDH	14.91
HepG2/SR+TCONS_00284048siRNA3		GAPDH	14.63
HepG2/SR+TCONS_00284048siRNA3		GAPDH	14.57
HepG2/SR+siRNA NC		TCONS_00284048	21.93
HepG2/SR+siRNA NC		TCONS_00284048	21.78
HepG2/SR+siRNA NC		TCONS_00284048	21.82
HepG2/SR+TCONS_00284048siRNA1		TCONS_00284048	23.42
HepG2/SR+TCONS_00284048siRNA1		TCONS_00284048	23.44
HepG2/SR+TCONS_00284048siRNA1		TCONS_00284048	23.35
HepG2/SR+TCONS_00284048siRNA2		TCONS_00284048	22.74
HepG2/SR+TCONS_00284048siRNA2		TCONS_00284048	22.69
HepG2/SR+TCONS_00284048siRNA2		TCONS_00284048	22.86
HepG2/SR+TCONS_00284048siRNA3		TCONS_00284048	22.83
HepG2/SR+TCONS_00284048siRNA3		TCONS_00284048	22.83
HepG2/SR+TCONS_00284048siRNA3		TCONS_00284048	22.82
