# Supplementary material for: Identification and validation of potential key long noncoding RNAs in sorafenib-resistant hepatocellular carcinoma cells
Source: PeerJ. 2020 Feb 26;8:e8624. doi: 10.7717/peerj.8624 (PMC7049252; doi:10.7717/peerj.8624)
Supplement: Supplemental Information 4 — For the TCONS_00006019 knockdown experiments, siRNA was designed and synthesized by Gene Pharma Company (Shanghai, China) and the sequences were as follows: TCONS_00006019siRNA1:GGCACTGCATTCATAAATA; TCONS_00006019siRNA2: GAGGAAGGAACTAATGTAA; TCONS_00006019siRNA3:CCAAGTCTCAGAACTAGTA. Transfections were carried out using lipofectamine 2000 reagent (Invitrogen) according to manufacturer’s protocol.The expression of TCONS_00006019 in sorafenib-resistant HepG2 cell lines (HepG2-S) were examined after transfected with siRNA knockdown system compared with the negative control (siRNA NC). Real-time PCR was performed using SYBR Premix Ex Taq (TaKaRa) on a LightCycler480 instrument (Roche Diagnostics) according to the manufacturer’s protocol. GAPDH was used as an internal normalized reference, and fold changes were calculated by relative quantification (2−ΔΔCt). TCONS_00006019siRNA2 was selected for use in further validation experiments. [file peerj-08-8624-s004.xlsx]

## Sheet: raw data
Sample		Task	Ct value
HepG2/SR+siRNA NC		GAPDH	14.78
HepG2/SR+siRNA NC		GAPDH	14.76
HepG2/SR+siRNA NC		GAPDH	14.73
HepG2/SR+TCONS_00006019siRNA1		GAPDH	15.1
HepG2/SR+TCONS_00006019siRNA1		GAPDH	14.98
HepG2/SR+TCONS_00006019siRNA1		GAPDH	15.11
HepG2/SR+TCONS_00006019siRNA2		GAPDH	15
HepG2/SR+TCONS_00006019siRNA2		GAPDH	15.06
HepG2/SR+TCONS_00006019siRNA2		GAPDH	15.05
HepG2/SR+TCONS_00006019siRNA3		GAPDH	14.84
HepG2/SR+TCONS_00006019siRNA3		GAPDH	15.08
HepG2/SR+TCONS_00006019siRNA3		GAPDH	15.07
HepG2/SR+siRNA NC		TCONS_00006019	24.36
HepG2/SR+siRNA NC		TCONS_00006019	24.3
HepG2/SR+siRNA NC		TCONS_00006019	24.38
HepG2/SR+TCONS_00006019siRNA1		TCONS_00006019	24.72
HepG2/SR+TCONS_00006019siRNA1		TCONS_00006019	24.74
HepG2/SR+TCONS_00006019siRNA1		TCONS_00006019	24.76
HepG2/SR+TCONS_00006019siRNA2		TCONS_00006019	25.9
HepG2/SR+TCONS_00006019siRNA2		TCONS_00006019	25.9
HepG2/SR+TCONS_00006019siRNA2		TCONS_00006019	25.95
HepG2/SR+TCONS_00006019siRNA3		TCONS_00006019	25.01
HepG2/SR+TCONS_00006019siRNA3		TCONS_00006019	24.69
HepG2/SR+TCONS_00006019siRNA3		TCONS_00006019	24.76
