# Supplementary material for: Identification and validation of potential key long noncoding RNAs in sorafenib-resistant hepatocellular carcinoma cells
Source: PeerJ. 2020 Feb 26;8:e8624. doi: 10.7717/peerj.8624 (PMC7049252; doi:10.7717/peerj.8624)
Supplement: Supplemental Information 5 — For the TCONS_00006019 knockdown experiments, siRNA was designed and synthesized by Gene Pharma Company (Shanghai, China) and the sequences were as follows: TCONS_00006019siRNA1:GGCACTGCATTCATAAATA; TCONS_00006019siRNA2: GAGGAAGGAACTAATGTAA; TCONS_00006019siRNA3:CCAAGTCTCAGAACTAGTA. Transfections were carried out using lipofectamine 2000 reagent (Invitrogen) according to manufacturer’s protocol.The expression of TCONS_00006019 in sorafenib-resistant Huh7 cell lines (Huh7-S) were examined after transfected with siRNA knockdown system compared with the negative control (siRNA NC). Real-time PCR was performed using SYBR Premix Ex Taq (TaKaRa) on a LightCycler480 instrument (Roche Diagnostics) according to the manufacturer’s protocol. GAPDH was used as an internal normalized reference, and fold changes were calculated by relative quantification (2−ΔΔCt). TCONS_00006019siRNA2 was selected for use in further validation experiments. [file peerj-08-8624-s005.xlsx]

## Sheet: raw data
Sample		Task	Ct value
Huh-7/SR+siRNA NC		GAPDH	14.26
Huh-7/SR+siRNA NC		GAPDH	14.25
Huh-7/SR+siRNA NC		GAPDH	14.27
Huh-7/SR+TCONS_00006019 siRNA1		GAPDH	14.52
Huh-7/SR+TCONS_00006019 siRNA1		GAPDH	14.54
Huh-7/SR+TCONS_00006019 siRNA1		GAPDH	14.73
Huh-7/SR+TCONS_00006019 siRNA2		GAPDH	14.46
Huh-7/SR+TCONS_00006019 siRNA2		GAPDH	14.75
Huh-7/SR+TCONS_00006019 siRNA2		GAPDH	14.5
Huh-7/SR+TCONS_00006019 siRNA3		GAPDH	14.3
Huh-7/SR+TCONS_00006019 siRNA3		GAPDH	14.35
Huh-7/SR+TCONS_00006019 siRNA3		GAPDH	14.34
Huh-7/SR+siRNA NC		TCONS_00006019	25.79
Huh-7/SR+siRNA NC		TCONS_00006019	25.65
Huh-7/SR+siRNA NC		TCONS_00006019	25.77
Huh-7/SR+TCONS_00006019 siRNA1		TCONS_00006019	26.01
Huh-7/SR+TCONS_00006019 siRNA1		TCONS_00006019	26.05
Huh-7/SR+TCONS_00006019 siRNA1		TCONS_00006019	26.09
Huh-7/SR+TCONS_00006019 siRNA2		TCONS_00006019	27.58
Huh-7/SR+TCONS_00006019 siRNA2		TCONS_00006019	27.64
Huh-7/SR+TCONS_00006019 siRNA2		TCONS_00006019	27.41
Huh-7/SR+TCONS_00006019 siRNA3		TCONS_00006019	25.91
Huh-7/SR+TCONS_00006019 siRNA3		TCONS_00006019	25.96
Huh-7/SR+TCONS_00006019 siRNA3		TCONS_00006019	25.75
